# Supplementary material
Source: Springer Nature journal article supplement (http://publikationen.ub.uni-frankfurt.de/opus4/files/868/12860_2007_21_MOESM9_ESM.pdf)

**A**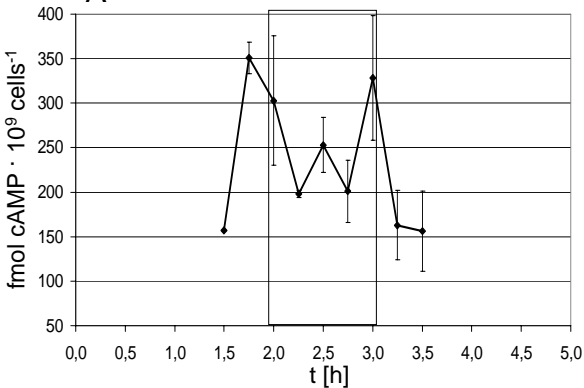**B**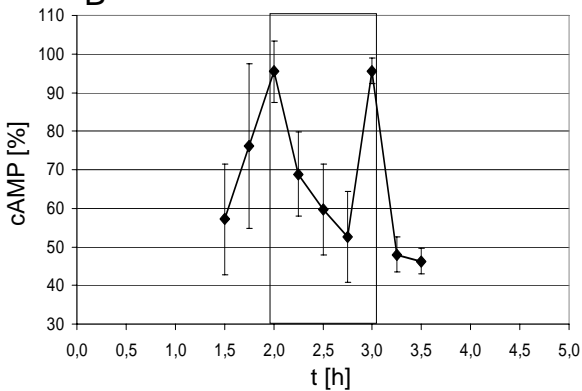

Supplement: MOESM9 [file 12860_2007_21_MOESM9_ESM.pdf]
